# Supplementary material for: Patrilocality and hunter-gatherer-related ancestry of populations in East-Central Europe during the Middle Bronze Age
Source: PubMed Central journal article supplement (PMC10393988; doi:10.1038/s41467-023-40072-9), 2023-08-01
Supplement: 41467_2023_40072_MOESM2_ESM.pdf [file 41467_2023_40072_MOESM2_ESM.pdf]

## Description of Additional Supplementary Files

File Name: Supplementary Data 1

Description: The archaeological context and basic sequencing statistics for all the individuals sampled for the project.

File Name: Supplementary Data 2

Description: The archaeological context, summary of some results and labels used in downstream analysis, for the individuals selected for the study (passing quality and coverage thresholds).

File Name: Supplementary Data 3

Description: Ancient reference individuals used in the study.

File Name: Supplementary Data 4

Description: Results of calling genotypes for 69 391 no-indel branch determining Y SNPs obtained from the International Society of Genetic Genealogy collection.

File Name: Supplementary Data 5

Description: The results of population vs population  $f_3$  statistics on autosomes.

File Name: Supplementary Data 6

Description: The results of population vs population  $f_3$  statistics on chromosome X.

File Name: Supplementary Data 7

Description: The results of individual vs population  $f_3$  statistics on autosomes.

File Name: Supplementary Data 8

Description: The results of individual vs population  $f_3$  statistics on chromosome X.

File Name: Supplementary Data 9

Description: The results of pairwise, individual vs individual  $f_3$  statistics on autosomal data.

File Name: Supplementary Data 10

Description: The results of D statistics in a form: D(YRI, Žerniki individual, Žerniki population, other TC individuals)

File Name: Supplementary Data 11

Description: Standard error values of the cross-validation error estimate for Admixture analysis.

File Name: Supplementary Data 12

Description: The results of D statistics in a form: D(YRI, ancient individual, population1, population2)

File Name: Supplementary Data 13

Description: The results of qpAdm analysis for 2-way admixture models.

File Name: Supplementary Data 14

Description: The results of qpAdm analysis for 3-way admixture models.

File Name: Supplementary Data 15

Description: The results of qpAdm analysis for 2-way admixture models, using rotating outgroup approach.

File Name: Supplementary Data 16

Description: The results of qpAdm analysis for 3-way admixture models, using rotating outgroup approach.

File Name: Supplementary Data 17

Description: The results of qpAdm analysis for 3-way individual level admixture models.

File Name: Supplementary Data 18

Description: The results of NGSrelate kinship analysis on autosomal data.

File Name: Supplementary Data 19

Description: The results of NGSrelate kinship analysis on X chromosome.

File Name: Supplementary Data 20

Description: The results of READ kinship analysis on autosomal data.

File Name: Supplementary Data 21

Description: The summary of the kinship analyses with final interpretations.
